# Supplementary material for: An in situ spectroscopic study of 2D CuS/Ti3C2 photocatalytic CO2 reduction to C1 and C2
Source: Royal Society of Chemistry journal article supplement (doi:10.1039/d4nj02327g), 2024-01-01
Supplement: d4nj02327g1.pdf [file d4nj02327g1.pdf]

## Supporting Information

1

2

3 **An in-situ spectroscopic study on 2D-CuS/Ti<sub>3</sub>C<sub>2</sub> photocatalytic CO<sub>2</sub> reduction to C1 and**

4 **C2**

5 Wanhe Li<sup>a</sup>, Yahui Chen<sup>a</sup>, Shuhan Jia<sup>a</sup>, Yiyang Zhou<sup>a</sup>, Yiting Hua<sup>a</sup>, Xinyu Lin<sup>a\*</sup>, Zhi Zhu<sup>a, b\*</sup>

6

7 a. School of Chemistry & Chemical Engineering, Jiangsu University, Zhenjiang, China, 212013.

8 b. Department of Biology, Hong Kong Baptist University, Hong Kong SAR, P.R. China

9

10

11

12

13

14

15

16

17

18

19

20

21

22

23

24

25

26

27 ***Corresponding authors:***

28 **Z.**

**Zhu**

**(zhuzhi@ujs.edu.cn)**

## 1 **Experimental Details**

### 2 **Chemicals and Materials**

3 Hydrofluoric acid (HF, AR, 40.0%) and aluminum titanium carbide ( $\text{Ti}_3\text{AlC}_2$ , 98%, 200 mesh) were obtained  
4 from McLean Shanghai. Ethylene glycol (EG), sodium thiosulfate ( $\text{Na}_2\text{S}_2\text{O}_3 \cdot 5\text{H}_2\text{O}$ ), and copper chloride  
5 ( $\text{CuCl}_2 \cdot 2\text{H}_2\text{O}$ ) were from Sinopharm Reagent Corporation. All reagents were of analytical grade and could be  
6 used without any further purification.

### 7 **Synthesis of 2D $\text{Ti}_3\text{C}_2$**

8 Firstly, 2 g of titanium aluminum carbide ( $\text{Ti}_3\text{AlC}_2$ ) was weighed and  $\text{Ti}_3\text{AlC}_2$  was slowly added to 40 mL of  
9 hydrofluoric acid (HF, 40 wt%) over 10 min. The reaction was stirred at 35 °C for 24 h under a thermostatic  
10 water bath, and at the end of the reaction, the precipitate was collected by centrifugation at 3500 rpm and  
11 washed repeatedly with deionized water until the pH of the supernatant was neutral. The resulting solid was  
12 dried in a vacuum oven at 60 °C for 12 h, and multilayer  $\text{Ti}_3\text{C}_2$  nanosheets were finally obtained.

### 13 **Synthesis of 2D CuS**

14 First, 10 mL of water and 30 mL of EG were mixed and stirred until well blended, then 341 mg of  $\text{CuCl}_2 \cdot 2\text{H}_2\text{O}$   
15 (2 mmol) and 496 mg of  $\text{Na}_2\text{S}_2\text{O}_3 \cdot 5\text{H}_2\text{O}$  (2 mmol) were weighed and added to the mixed solution with  
16 continued stirring. After the solution was stirred to a yellow-green color, it was transferred to a 100 mL round-  
17 bottomed flask and placed in an oil bath at 70 °C and heated for 4 h with constant stirring. At the end of the  
18 reaction, the flask was removed from the oil bath, cooled to room temperature and washed several times with  
19 ethanol and water, retaining the solids and discarding the supernatant, and dried under vacuum at 60 °C  
20 overnight.

### 21 **Synthesis of 2D/2D CuS/ $\text{Ti}_3\text{C}_2$**

22 First, a quantitative amount of multilayer 2D  $\text{Ti}_3\text{C}_2$  powder was weighed and added to a mixture of 10 mL of  
23 water and 30 mL of EG and sonicated for 30 min to form a homogeneous dispersion. Then 341 mg of  
24  $\text{CuCl}_2 \cdot 2\text{H}_2\text{O}$  (2 mmol) and 496 mg of  $\text{Na}_2\text{S}_2\text{O}_3 \cdot 5\text{H}_2\text{O}$  (2 mmol) were weighed and added to the above  
25 dispersion with continuous stirring until the solution turned dark green. It was then transferred to a 100 mL  
26 round-bottomed flask and placed in an oil bath at 70 °C with constant stirring and heating for 4 h. At the end  
27 of the reaction, the solution was cooled to room temperature and then washed several times with ethanol and  
28 water crosswise, retained as a solid and dried under vacuum at 60 °C overnight. A series of 2D/2D CuS/ $\text{Ti}_3\text{C}_2$   
29 samples, i.e., 4 mmol, 8 mmol, 16 mmol, 24 mmol, and 32 mmol, were prepared by the addition of  
30 multilayered 2D  $\text{Ti}_3\text{C}_2$  powders in different amounts of substances, while keeping the concentration of the  
31 CuS precursor (2 mmol) constant. The generated 2D/2D CuS/ $\text{Ti}_3\text{C}_2$  nanocomposites were prepared according

1 to the molar ratio of CuS to  $Ti_3C_2$  named as CuS/ $Ti_3C_2$  (1:n), n=2, 4, 8, 12, 16.

2

### 3 **Material Characterizations**

4 The surface morphology and microstructure of the products were photographed using a FE-SEM, JSM-7001F  
5 scanning electron microscope (SEM) from JEOL, Japan. The crystal structure of the product was obtained by  
6 X-ray diffraction (XRD) using a Shimadzu XRD-6100 powder model from Tsushima Corporation, Japan. The  
7 valence states of the elements were studied by X-ray photoelectron spectroscopy (XPS) using Thermo ESCAL  
8 AB 250XI model from Thermo Fisher Scientific, USA. The UV absorption spectra of the products were  
9 obtained by a Shimadzu UV-3600 UV-Vis diffuse reflectance spectrometer from Tsushima Corporation,  
10 Japan. The fluorescence spectra of the products were obtained by a steady state/transient fluorescence  
11 spectrometer model Edinburgh FLS 1000 from Edinburgh Instruments, UK. Electrochemical correlation  
12 characterization was carried out by an electrochemical workstation model CHI660E from Shanghai Chenhua  
13 Instrument Factory. The in situ infrared characterization of the products was carried out using a diffuse  
14 reflectance Fourier transform infrared (FTIR) spectrometer model Nicolet Is10 from Thermo Fisher Scientific,  
15 USA.

16

### 17 **Photocatalytic CO<sub>2</sub> reduction**

18 Photocatalytic CO<sub>2</sub> reduction experiments were carried out in a homemade 50 mL closed quartz reactor. Ten  
19 mg of catalyst was dispersed in 10 mL of deionized water and sonicated for 20 min to make it uniformly  
20 dispersed. Subsequently, high-purity CO<sub>2</sub> was introduced into the reaction system for 30 min to completely  
21 exhaust the air and saturate the system with CO<sub>2</sub>. The photocatalytic CO<sub>2</sub> reduction performance was then  
22 tested using a 300 W xenon lamp (500 mW cm<sup>-2</sup>) as a light source. The gaseous products were qualitatively  
23 and quantitatively detected by a gas chromatograph (GC 5890N) equipped with a hydrogen flame ionization  
24 detector (FID) and using nitrogen (N<sub>2</sub>) as carrier gas. In particular, the gas chromatograph was equipped with  
25 a well-sealed gas injection needle, and samples were taken and injected into the chromatography every one  
26 hour of light exposure, with four hours as a complete photocatalytic CO<sub>2</sub> reduction test. The inlet consists of  
27 two signal channels, A and B. Channel A detects multi-carbon products (e.g., C<sub>2</sub>H<sub>4</sub>) in the reduction products,  
28 while channel B detects one-carbon products (e.g., CO, CH<sub>4</sub>).

29

### 30 **In situ FTIR investigation into photocatalytic CO<sub>2</sub> reduction**

31 In-situ diffuse reflectance infrared Fourier transform spectroscopy (In-situ Transmission) experiments were

1 carried out on a Thermo Scientific Nicolet Is10 (Thermo Fisher Scientific, USA) spectrometer fitted with a  
2 photoconductive detector (mercury cadmium telluride, MCT). The catalyst samples were sealed in a reaction  
3 chamber with two zinc selenide (ZnSe) windows. CO<sub>2</sub> gas was brought into the reaction chamber by means of  
4 a gas path through a water bulb until equilibrium. A xenon lamp was used as a light source, which was reflected  
5 into the ZnSe windows of the chamber through a reflector to carry out the in-situ photoresponse, and the  
6 infrared spectral signals were recorded and saved on a monitor connected to it. All in situ infrared  
7 spectroscopic measurements were performed at atmospheric pressure and room temperature.

8

### 9 **Calculation of Apparent Quantum Efficiency (AQY)**

10 The apparent quantum efficiency is given by the following equation :

$$11 \quad AQY = \frac{8 \times \text{the number of evolved } CH_4 \text{ molecules}}{N}$$

12

13 where E represents the electron charge;  $\lambda$  represents the wavelength of incident light; h represents Planck's  
14 constant; c represents the speed of light; and N represents the number of incident photons.

15

16

17

# 1 Supplementary Figures

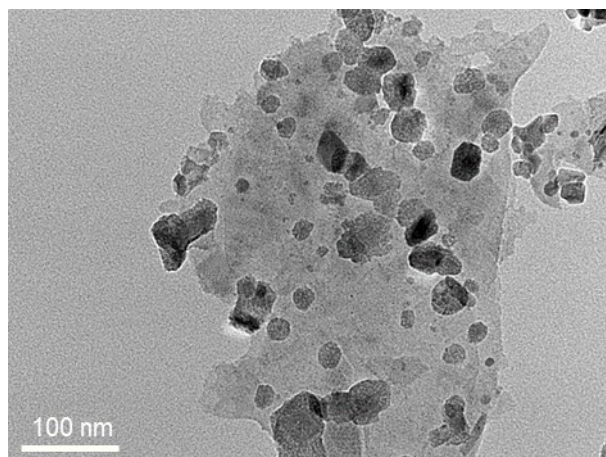

2  
3  
4  
**Figure S1.** TEM of CuS/Ti<sub>3</sub>C<sub>2</sub>.

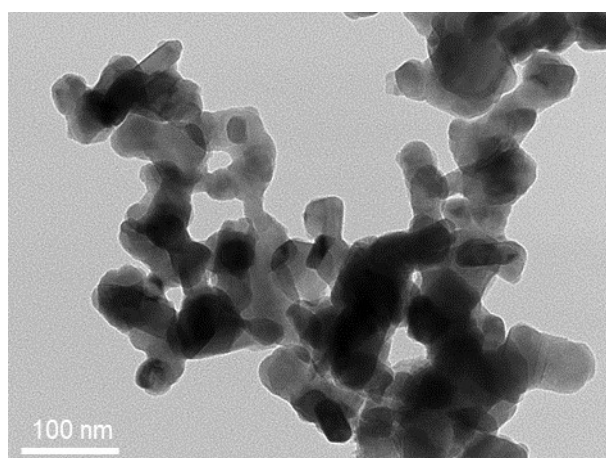

5  
6  
7  
**Figure S2.** TEM of CuS.

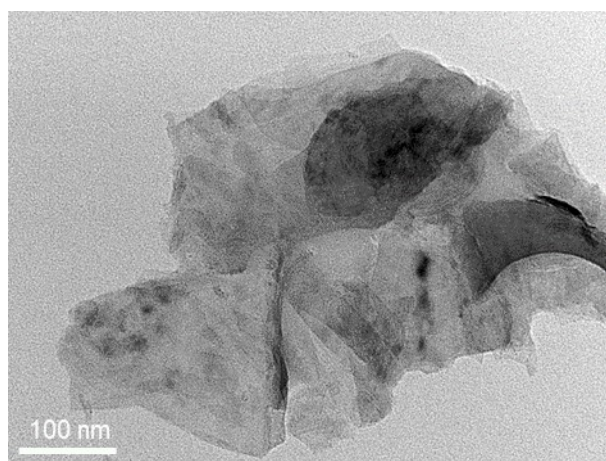

8  
9  
**Figure S3.** TEM of Ti<sub>3</sub>C<sub>2</sub>.

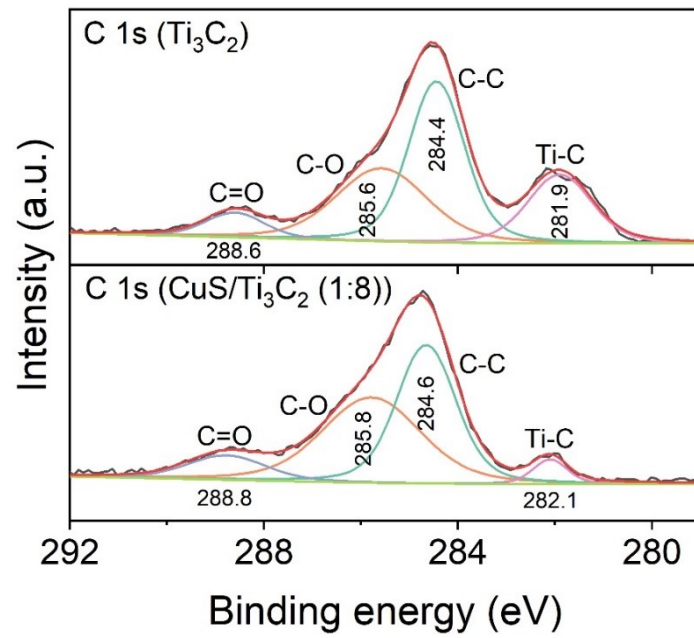

Figure S4. XPS spectra of C 1s for  $\text{Ti}_3\text{C}_2$  and  $\text{CuS}/\text{Ti}_3\text{C}_2$  (1:8).

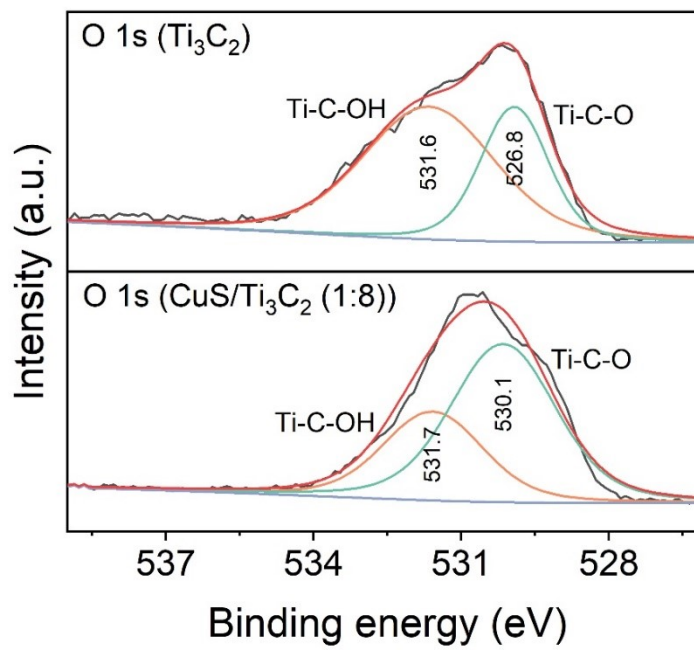

Figure S5. XPS spectra of O 1s for  $\text{Ti}_3\text{C}_2$  and  $\text{CuS}/\text{Ti}_3\text{C}_2$  (1:8).

1  
2  
3  
4

5  
6

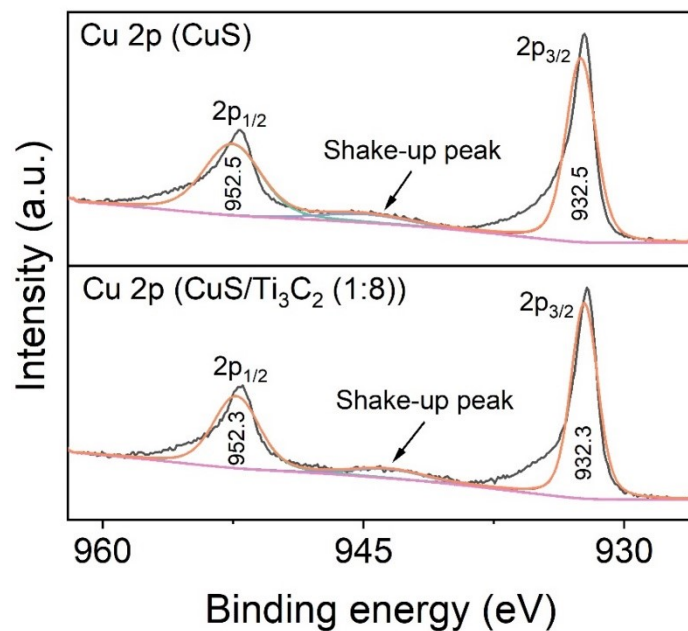

Figure S6. XPS spectra of Cu 2p for CuS and CuS/Ti<sub>3</sub>C<sub>2</sub> (1:8).

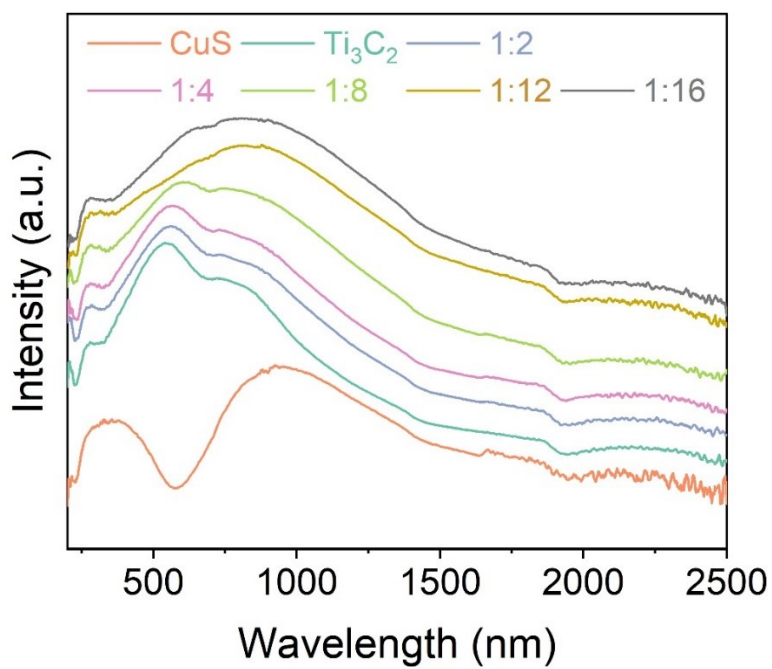

Figure S7. UV-vis DRS spectra of CuS, Ti<sub>3</sub>C<sub>2</sub> and different CuS/Ti<sub>3</sub>C<sub>2</sub> catalysts.

1  
2  
3  
4

5  
6  
7

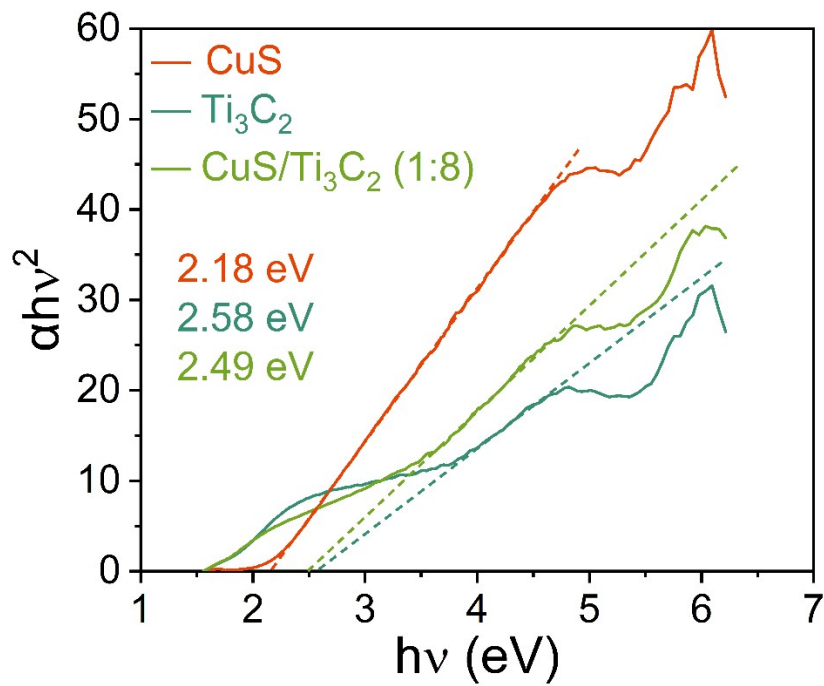

1

2 **Figure S8.** (a) UV-vis DRS spectra of CuS, Ti<sub>3</sub>C<sub>2</sub> and different CuS/Ti<sub>3</sub>C<sub>2</sub> catalysts; (b) (ahv)<sup>2</sup>-hv curve of CuS, Ti<sub>3</sub>C<sub>2</sub> and  
 3 CuS/Ti<sub>3</sub>C<sub>2</sub> (1:8) catalysts.

4

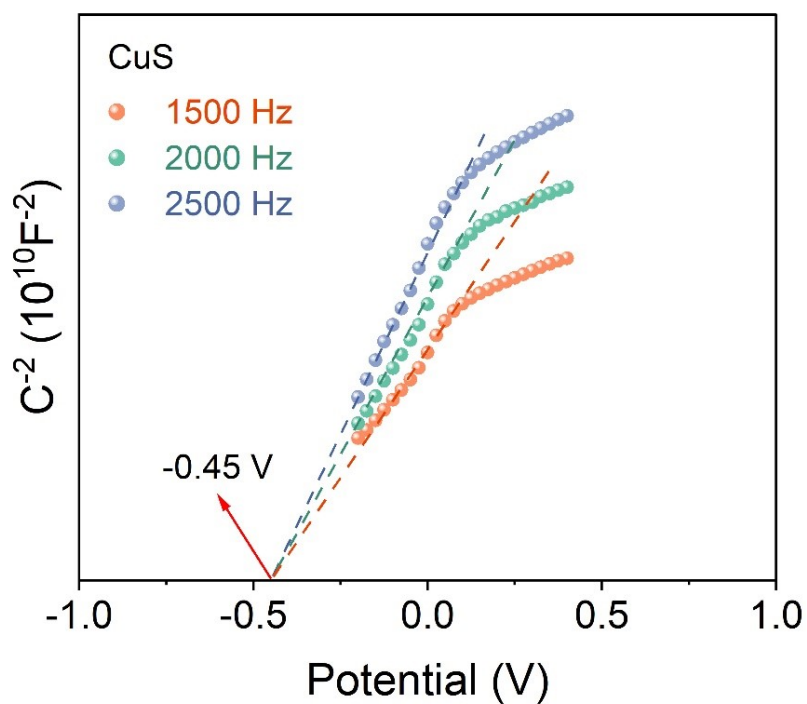

5

6

7

**Figure S9.** M-S curves of CuS.



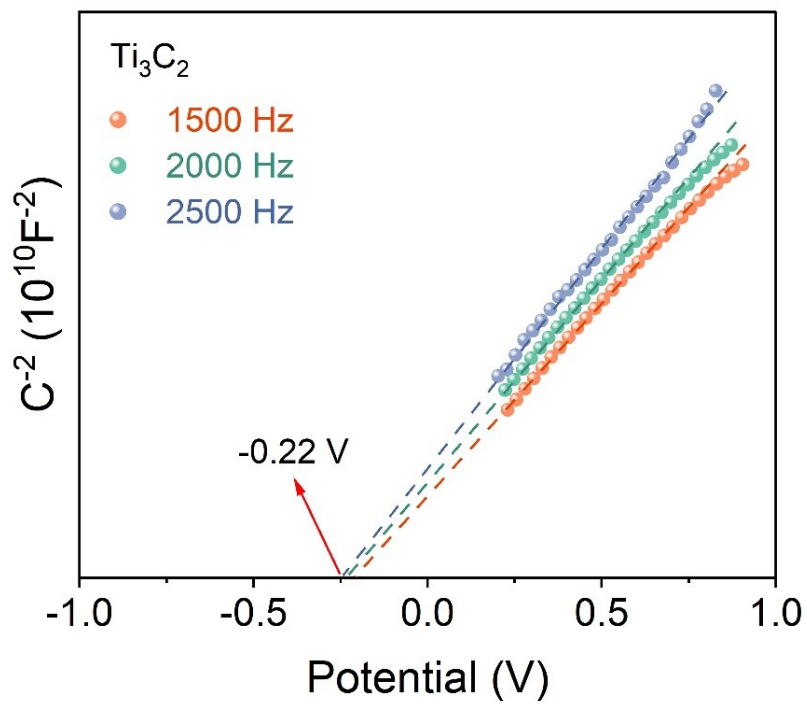

Figure S10. M-S curves of  $\text{Ti}_3\text{C}_2$ .

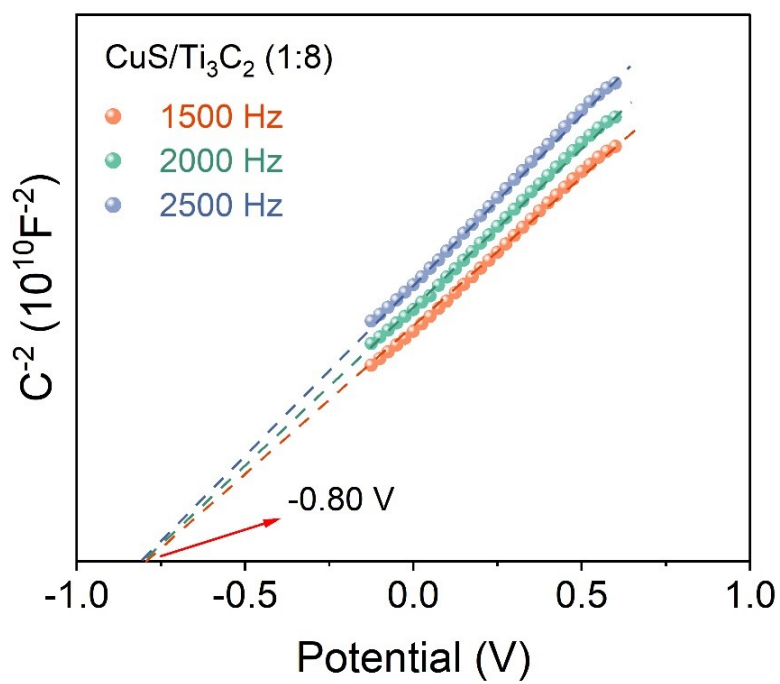

Figure S11. M-S curves of  $\text{CuS}/\text{Ti}_3\text{C}_2$  (1:8).

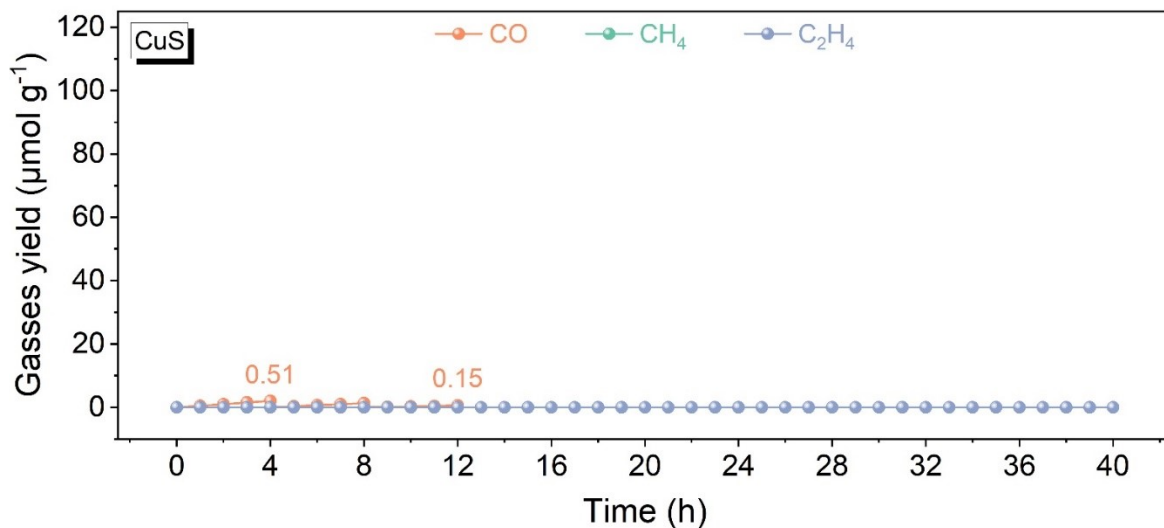

1

2 **Figure S12.** Long-term recycling gases production performances over CuS NFs under white light (Xe lamp, 500 mW·cm<sup>-2</sup>)

3

in 40 h

4

5

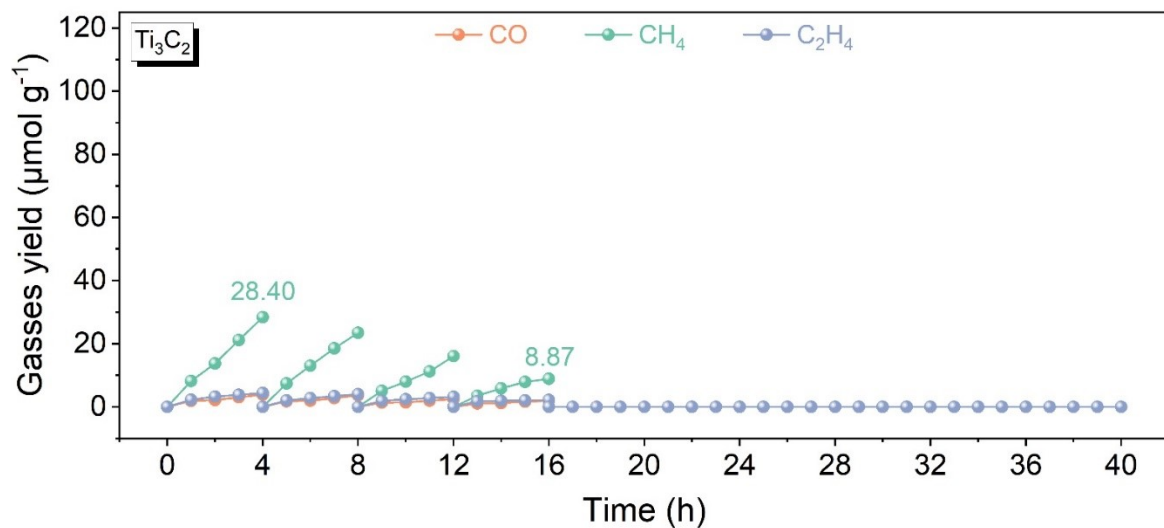

6

7 **Figure S13.** Long-term recycling gases production performances over Ti<sub>3</sub>C<sub>2</sub> sample under white light (Xe lamp, 500

8

mW·cm<sup>-2</sup>) in 40 h

9

10

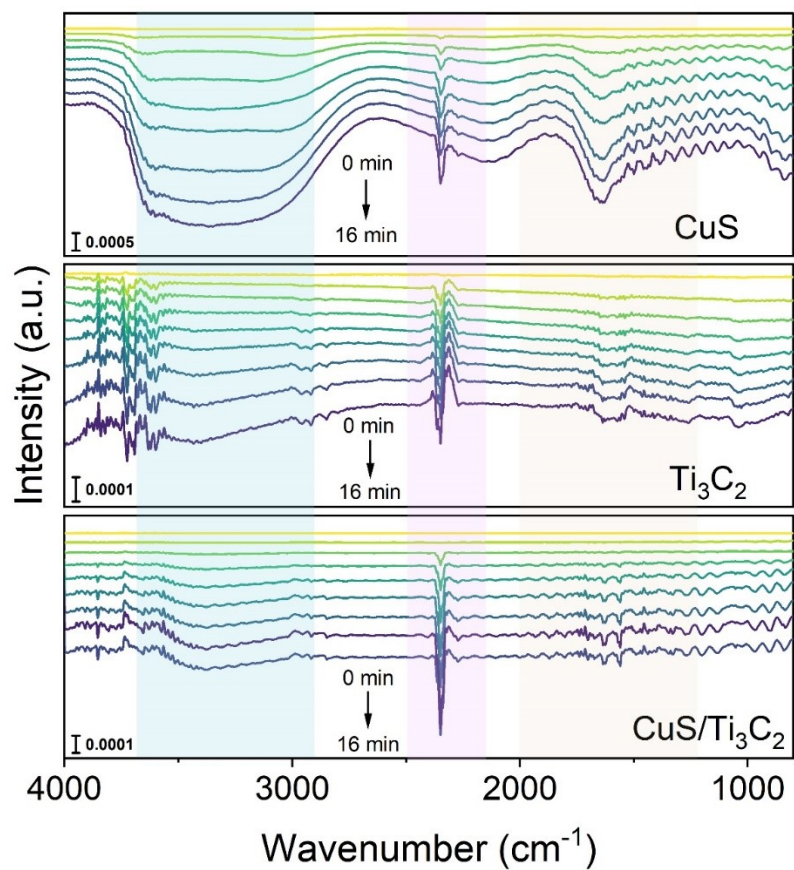

1  
2 **Figure S14.** In-situ-FTIR spectra collected from the interface with co-adsorbed  $\text{H}_2\text{O}$  and  $\text{CO}_2$  under white light (Xe  
3 lamp,  $100 \text{ mW} \cdot \text{cm}^{-2}$ ) irradiation in 16 min using  $\text{CuS}$ ,  $\text{Ti}_3\text{C}_2$  and  $\text{CuS}/\text{Ti}_3\text{C}_2$  (1:8) catalysts.  
4

1 **Supplementary Tables**

2

3

**Table S1.** Wavelength-dependent AQYs on CuS/Ti<sub>3</sub>C<sub>2</sub> (1:8) catalyst.

| CuS/Ti <sub>3</sub> C <sub>2</sub> (1:8) |                                                         |                                            |                         |                                       |         |
|------------------------------------------|---------------------------------------------------------|--------------------------------------------|-------------------------|---------------------------------------|---------|
| 波长 (nm)                                  | CH <sub>4</sub> evolution<br>( $\mu\text{mol g}^{-1}$ ) | Light intensity<br>( $\text{mW cm}^{-2}$ ) | Irradiation<br>time (h) | Irradiation area<br>( $\text{cm}^2$ ) | AQY (%) |
| 365                                      | 0.120                                                   | 10                                         | 1                       | 4                                     | 0.211   |
| 420                                      | 0.078                                                   | 20                                         | 1                       | 4                                     | 0.061   |
| 450                                      | 0.119                                                   | 20                                         | 1                       | 4                                     | 0.087   |
| 475                                      | 0.153                                                   | 20                                         | 1                       | 4                                     | 0.109   |
| 500                                      | 0.183                                                   | 20                                         | 1                       | 4                                     | 0.122   |
| 535                                      | 0.214                                                   | 20                                         | 1                       | 4                                     | 0.131   |
| 578                                      | 0.200                                                   | 20                                         | 1                       | 4                                     | 0.117   |
| 600                                      | 0.119                                                   | 20                                         | 1                       | 4                                     | 0.065   |
| 650                                      | 0.065                                                   | 20                                         | 1                       | 4                                     | 0.033   |
| 670                                      | 0.040                                                   | 20                                         | 1                       | 4                                     | 0.018   |
| 730                                      | 0.021                                                   | 20                                         | 1                       | 4                                     | 0.016   |
| 765                                      | 0.008                                                   | 20                                         | 1                       | 4                                     | 0.014   |
| 850                                      | 0.001                                                   | 20                                         | 1                       | 4                                     | 0.011   |
| 940                                      | 0.001                                                   | 20                                         | 1                       | 4                                     | 0.011   |

4
